# Supplementary material
Source: Frontiers journal article supplement (https://www.frontiersin.org/articles/555954)
Supplement: Table_1.XLSX [file Table_1.XLSX]

## Sheet: Sheet1
Modification	Product	Titer (g/L), Rate (g/L h) , Yield (g/g)	Fermentation Mode, Substrate	Reference	Notes
Molecular Engineering
pta deletion	Butyrate	32.5, 0.63, 0.38	Fed-batch, glucose	Zhu, et al. 2005 (62)
ack deletion	Butyrate	41.7, --, 0.42	Fed-batch, glucose	Liu, et al. 2006 (51)	pH 6
ack deletion	Butyrate	50.1, --, 0.45	FBB reactor, glucose	Liu, et al. 2006 (51)	pH 6
ack deletion	Butyrate	13.6, --, 0.44	FBB reactor, xylose	Liu, et al. 2006 (51)	pH 5 with no lactic acid or acetic acid coproducts
ptb deletion	Butyrate	--, 0.20, 0.36	Batch, glucose	Zhang, et al. 2012 (61)
ptb deletion	Butyrate	--, 0.22, 0.35	Batch, xlyose	Zhang, et al. 2012 (61)
pfkA and pykA overexpression	Butyrate	48.2, 0.50, 0.38	Fed-batch, glucose	Sou, et al. 2018 (64)	High glucose concentration of 120 g/L
crt and cat1 overexpression	Butyrate	37.5, 0.39, 0.40	Fed-batch, glucose	Sou, et al. 2018 (41)	Butyrate/Acetate ratio (g/g) 15.76
crt, cat1, pfkA, and pykA overexpression	Butyrate	47.6, 0.50, 0.39	Fed-batch, glucose	Sou, et al. 2018 (41)	Butyrate/Acetate ratio (g/g) 13.72
xylTAB overexpression	Butyrate	46.4, 0.87, 0.43	Free-cell batch, xylose and glucose	Fu et al. 2017 (52)	pH 6, 3.75 uM of benzyl viologen (BV), acetate titer of 0.8 g/L
galKETP overexpression	Butyrate	34.3, 0.36, 0.37	Batch, spent coffee ground hydrolysate	He, et al. 2020 (60)	5 L bioreactor
scrBAK overexpression	Butyrate	45.71, --, 0.39	Fed-batch, untreated cane molasses	Guo et al. 2020 (68)
ack deletion, adhE2 overexpression	Butanol	10.0, --, --	Batch, P2 media (50 g/L glucose)	Yu, et al. 2011 (69)	Batch fermentations in 40 mL serum bottles
ack deletion, adhE2 overexpression with methyl viologen	Butanol	~45, --, 0.30	Fed-batch, glucose	Du, et al. 2015 (70)	500 uM methyl viologen (MV)
ack deletion, adhE2 overexpression with methyl viologen	Butanol	~55, --, 0.33	FBB reactor, glucose	Du, et al. 2015 (70)	500 uM methyl viologen (MV)
ack deletion, adhE2 and agluI overexpression	Butanol	17.3, 0.40, 0.17	Batch, maltose	Yu, et al. 2015 (71)	pH 5.8, no antibiotics
ack deletion, adhE2 and scrABK overexpression	Butanol	18.8, 0.20, 0.21	Batch, sucrose	Zhang, et al. 2017 (57)	350 uM methyl viologen (MV)
ack deletion, adhE2 and scrABK overexpression	Butanol	14.8, 0.15, 0.21	Batch, sugarcane juice	Zhang, et al. 2017 (57)	350 uM MV
ack deletion, adhE2 overexpression	Butanol	15, 0.3, 0.3	Repeated-batch FBB, cassava bagasse hydrolysate	Huang, et al. 2019 (93)
ack deletion, adhE2 overexpression ctfAB overexpression	Butanol	~10.5, ~0.24, ~ 0.24	Batch, glucose	Yu, et al. 2015 (63)	pH 5, pSV6
fdh, adhE2 overexpression	Butanol	12.34, 0.26, 0.23	Fed-batch, glucose	Ma, et al. 2016 (94)	Media included sodium formate, B12, and MV hydrate to further balance redox
cat1 deletion, replaced with adhE2	Butanol	26.2,--,--	Batch, glucose	Zhang, et al. 2018 (54)	20 ℃
cat1 deletion, replaced with adhE2	Butanol/Ethanol	35.1, 0.31, --	Batch, glucose	Zhang, et al. 2018 (54)	20 ℃
hydA overexpression	Hydrogen	NR	Batch, glucose	Jo, et al. 2010 (75)	C. tyrobutyricum JM1 strain, 160 ml batch
exo-inulinase overexpression	Hydrogen	--, 620 ml/L h , 3.7 mol/mol	Batch, inulin	Jiang, et al. 2017 (76)	100 g/L inulin in 500 L simultaneous saccharification and fermetation process
Bs2 reporter expression driving isopropanol machinery	Isopropanol	1.6, -- , --	Batch, glucose	Cheng,, et al. 2019 (53)	Batch fermentation in serum vials.
∆cat1::adhE1, lipaseB overexpression	Ethyl acetate	8.6, --, --	Batch, glucose	Feng, et al. 2020 (95)	JZ-6 strain
groESL overexpression	Butyrate	44.1, 0.39, 0.34	Fed-batch, glucose	Sou, et al. 2017 (58)	ATCC 25755
groESL overexpression	Butyrate	52.2, 0.41, 0.37	FBB reactor, glucose	Sou, et al. 2017 (58)	ATCC 25755
groESL overexpression	Butyrate	16.1, 0.38, 0.35	Batch, corn straw hydrolysate	Sou, et al. 2018 (72)	ATCC 25755
groESL overexpression	Butyrate	16.9, 0.40, 0.35	Batch, rice straw hydrolysate	Sou, et al. 2018 (72)	ATCC 25755
treS overexpression	Butyrate	~36, --, --	Batch, glucose	Wu, et al. 2017 (97)	Hypoxic conditions (O2 10%), pH 7, Maltose for treS expression, W428 strain
Mutations and Adaptive Evolution
Adaptive evolution on high glucose concentration	Butyrate	67.5, 2.25, 0.45	Repeated-batch FBB, glucose	Jiang, et al. 2012 (65)
Adaptive evolution on pretreated and hydrolyzed wheat straw (PHWS)	Butyrate	19.0, 0.03, 0.40	Batch, 70% v/v PHWS	Baroi, et al. 2015 (66)	Butyrate selectivity at 0.92 g/g
Adaptive evolution on S. japonica hydrolysate	Butyrate	10.5, --, 0.33	Batch, S. japonica hydrolysate	Ra, et al. 2019 (67)	200 mM NaHCO3 in 120 mL serum vials
Single round of irradiation via 12C6+	Butyrate	33, --, --	Batch, glucose	Zhou, et al. 2014 (73)	Dose of 40 Gy at energy 114 AMeV
Single round of irradiation via 12C6+	Buryate	5.8, --, --	Batch, Eucommia ulmoides Oliv hydrolysate	Zhou, et al. 2014 (96)
Two rounds of irradiation via 12C6+	Butyrate	57.63, --, --	Batch, glucose	Zhou, et al. 2016 (74)	pH 5
Novel fermentation methods:
Bioelectrical reactor with 0.5 mM MV	Butryate	8.8, 0.28, 0.44	BER, sucrose	Choi, et al. 2012, (98)	C tyrobutiricum Bas 7, pH 6
FBB adjusting for sugarcane bagasse hydrolysate	Butyrate	20.9, 0.51, 0.48	Fed-batch, sugarcane bagasse hydrolysate	Wei, et al. 2013 (100)
Moving FBB	Butyrate	65.4, 0.37, 0.39	Fed-batch, glucose	Shi, et al. 2014 (101)
Repeat FBB	Butyrate	86.9, 1.1, 0.46	Fed-batch No. 8, glucose	Jiang, et al. 2011 (46)
Immobilized PVA gel	Butyrate	6.8, 1.74, 0.44	Repeated-batch No 41-71	Rebros, et al. 2016 (99)	C. tyrobutyricum DSM 2637
Consolidated hydrolysis/fermentation	Butyrate	18.05, --, 0.26	Fed-batch, alkali treated rice straw	Chi, et al. 2018 (102)
REED1 in situ acid removal on PHWS strain in syntehtic media Butryate	Butyrate	5.21, 0.79, 0.38	Continuous, glucose/xylose	Baroi, et al. 2015 (104)
Pertractive fed-batch on DDR hydrolysate	Butyrate	54, 0.70, 0.45	Fed-batch, corn stover hydrolysate	Nelson, et al. 2019 (103)
Co-Fermentation
FBB immobilized co-culture with C beijerinckii	Butanol	13.26, 0.28, 0.32	Immobilized FBB co-culture , cassava bagasse hydrolysate	Zhang, et al. 2016 (105)
FBB immobilized co-culture with C beijerinckii	Isopropanol	7.63, 0.16, 0.19	Immobilized FBB co-culture, cassava bagasse hydrolysate	Zhang, et al. 2016 (105)
FBB immobilized co-culture with C beijerinckii	Butanol	6.66, 0.96, 0.18	Continuous, cavassa starch	Li, et al. 2013 (106)
Co-culture with C beijerinckii BGS1	Butyl-butryate	5.1, --, --	Batch, glucose	Cui, et al. 2020 (107)	Clostridium tyrobutyricum ATCC 25,755
Co-culture with Bacillus sp. SGP1	Butyrate	34.2, 0.3, 0.35	Fed-batch, sucrose	Dwidar, et al. 2013 (108)
Novel Media/Optimization
Xlyose sugar concentration optimizated at 75g	Butyrate	15.4, --, 0.32	Batch	Luo, et al. 2017 (109)	300 mL fermentation in 500 ml flask
Glucose sugar concentration optimizated at 75g	Butyrate	26.0, --, 0.39	Batch	Luo, et al. 2017 (109)	300 mL fermentation in 500 ml flask
Low concentration (5g/L) Arabinose enhancement	Butyrate	20.3, --, --	Batch, glucose/xlylose	Chen, et al. 2017 (110)	300 mL fermentation in 500 ml flask
Corncob hydrolysate	Butryate	10.6, --, --	Batch	Chen, et al. 2017 (110)	300 mL fermentation in 500 ml flask
Brown algae and rice straw at 8:2 ratio	Butyrate	12.37, --, 0.46	Batch	Oh, et al. 2019 (111)	Clostridium tyrobutyricum ATCC25755
Impact of glycoerol on selectivity	Butyrate	54.79, --, 0.464	Batch, glucose-xylose	Oh, et al. 2019 (112)	20 g/l glycerol
Lipase with butanol for biocatalysis	Butyl-butryate	36.9, --, --	Batch, glucose	Zhang, et al. 2017 (113)	50% of bioreactor was hexadecane for extraction, pH 5.5, Supplemented butanol 10 g/L
In-situ detoxification rice straw hydrolysate with Tween 80	Butryate	8.7, --, --	Batch	Lee, et al. 2015 (114)
Recycled waste paper	Butyrate	20.31, 1.56, 0.41	Repeat-batch immobilized FBB	Huang, et al. 2016 (115)
Hydrolyzed oilseed rape straw	Butyrate	13.6, 2.46, 0.43	Repeat-batch immobilized FBB	Huang, et al. 2016 (116)	C. tyrobutyricum ZJU8235 with inactivated ack gene
Corn husk hydrolysate	Butyrate	20.75, 0.42, 0.39	FBB reactor	Xiao, et al. 2018 (117)
Paper Mill sludge mixed with rich media	Buryate	6.8, --, --	Batch	Liu, et al. 2018 (118)	Clostridium tyrobutyricum NRRL B-67062/RPT 4213
